# Supplementary material for: 129Xe MRI ventilation defects in ever-hospitalised and never-hospitalised people with post-acute COVID-19 syndrome
Source: PubMed Central journal article supplement — BMJ Open Respir Res. 2022 May 18;9(1):e001235. doi: 10.1136/bmjresp-2022-001235 (PMC9119175; doi:10.1136/bmjresp-2022-001235), 2022-05-18
Supplement: bmjresp-2022-001235supp001.pdf [file bmjresp-2022-001235supp001.pdf]

**<sup>129</sup>Xe MRI Ventilation Defects in ever- and never- hospitalised people with post-acute  
COVID-19 Syndrome  
Supplemental Materials**

**Table S1. Demographic Characteristics by Site**

| Parameter mean (SD)<br>[mean/MEDIAN: min-max] | Never-COVID (n=9) |                 |           | Ever-COVID (n=76) |                  |            |
|-----------------------------------------------|-------------------|-----------------|-----------|-------------------|------------------|------------|
|                                               | Site 1<br>(n=6)   | Site 2<br>(n=3) | Sig.<br>p | Site 1<br>(n=54)  | Site 2<br>(n=22) | Sig.<br>p  |
| Age years                                     | 35 (14)           | 37 (6)          | .8        | 54 (13)           | 50 (11)          | .2         |
| Female n (%)                                  | 3 (50)            | 2 (67)          | .6        | 27 (50)           | 11 (50)          | .9         |
| BMI kg/m <sup>2</sup>                         | 25 (3)            | 28 (9)          | .8        | 30 (5)            | 29 (6)           | .2         |
| SpO <sub>2</sub> %                            | 97 (2)            | ND              | -         | 97 (2)            | 98 (2)           | <b>.01</b> |
| Heart rate beats/min                          | 87 (20)           | ND              | -         | 77 (13)           | 78 (14)          | 1.0        |
| Blood pressure mmHg                           | 119/18 (79/12)    | ND              | -         | 124/83 (13/10)    | 126/79 (16/10)   | -          |
| Weeks Since + COVID Test                      | N/A               | N/A             | -         | [15/12: 5-53]     | [10/9: 5-18]     | <b>.01</b> |
| Smoking history pack-years                    | 0 (0)             | 0 (0)           | 1.0       | 7 (15)            | 11 (23)          | .4         |
| No Prior Respiratory Illness n (%)            | 0 (0)             | 0 (0)           | 1.0       | 35 (65)           | 15 (64)          | .9         |
| Prior Respiratory Illness n (%)               | 0 (0)             | 0 (0)           | 1.0       | 19 (35)           | 8 (36)           | .9         |
| Asthma n (%)                                  | 0 (0)             | 0 (0)           | 1.0       | 15 (28)           | 6 (27)           | 1.0        |
| COPD n (%)                                    | 0 (0)             | 0 (0)           | 1.0       | 4 (7)             | 2 (9)            | .8         |
| Ever-hospitalised n (%)                       | N/A               | N/A             | -         | 18 (33)           | 5 (23)           | .4         |
| Hospital Admission days                       | N/A               | N/A             | -         | 14 (18)           | 9 (4)            | .5         |

BMI=body mass index; ND=not done; COPD=chronic obstructive pulmonary disease.

p=significance value between Site 1 and Site 2.

**Table S2. Patient Listing of Medications at Research Visit**

| Participant | Medications                                                                                                                                                 |
|-------------|-------------------------------------------------------------------------------------------------------------------------------------------------------------|
| P01         | Symbicort; Salbutamol; Spiriva; Fluticasone; Warfarin; Rosuvastatin; Metoprolol; Spironolactone; Dapagliflozin/Metformin; Sitagliptin; Lorazepam            |
| P02         | None                                                                                                                                                        |
| P03         | Indapamide; Gliclazide; Empagliflozin; Atorvastatin; Metformin; Sitagliptin; Tamsulosin; Ranitidine; Levothyroxine; Bisoprolol                              |
| P04         | Insulin; Pregabalin; Gliclazide; Perindopril; Rosuvastatin; Sitagliptin/Metformin; Empagliflozin; Ezetimibe                                                 |
| P05         | Formoterol-mometasone                                                                                                                                       |
| P06         | Pantoprazole; Apixaban                                                                                                                                      |
| P07         | Levothyroxine                                                                                                                                               |
| P08         | Levothyroxine; Symbicort; Trimethoprim and sulfamethoxazole                                                                                                 |
| P09         | Symbicort; Amitriptyline; Naproxen; Pregabalin; Rosuvastatin; Sertraline                                                                                    |
| P10         | Salbutamol                                                                                                                                                  |
| P11         | Olanzapine; Fluoxetine; Quetiapine; Salbutamol                                                                                                              |
| P12         | Symbicort                                                                                                                                                   |
| P13         | None                                                                                                                                                        |
| P14         | Fluticasone propionate-salmeterol; Salbutamol; Desvenlafaxine; Pantoprazole; Aripiprazole                                                                   |
| P15         | None                                                                                                                                                        |
| P16         | Symbicort; Atenolol; Hydrochlorothiazide; Candesartan                                                                                                       |
| P17         | Metformin; Rosuvastatin; Amlodipine; Ramipril; Hydrochlorothiazide                                                                                          |
| P18         | Metformin; Irbesartan; Esomeprazole; Tramadol; Azythromycin; Dexamethasone                                                                                  |
| P19         | Rivarokaban; Levothyroxine; Oral Contraceptive                                                                                                              |
| P20         | Symbicort; Singulair; Tresiba; Jardiance; Ezetrol; Insulin; Rivaroxaban; Glumetza; Pravastatin; Colchicine; Pantoprazole                                    |
| P21         | Pregabalin                                                                                                                                                  |
| P22         | Perindopril; Pantoprazole; Rosuvastatin; Spiriva; Ezetimibe; Amlodipine; Bimatropost; Salbutamol; Epipen                                                    |
| P23         | Metformin; Symbicort                                                                                                                                        |
| P24         | None                                                                                                                                                        |
| P25         | None                                                                                                                                                        |
| P26         | Gabapentin; Canagliflozin; Levothyroxine; Saxagliptin; Dexamethasone; Rosuvastatin; Metformin; Symbicort                                                    |
| P27         | Ustekinumab; Symbicort; Salbutamol                                                                                                                          |
| P28         | Nabilone; Venlafaxine; Ferrous Gluconate; Dexamethasone; Rosuvastatin; Levothyroxine; Gabapentin                                                            |
| P29         | Trazodone; Bupropion                                                                                                                                        |
| P30         | Symbicort                                                                                                                                                   |
| P31         | None                                                                                                                                                        |
| P32         | Cetirizine; Trazodone; Rizatriptan; Betahistine                                                                                                             |
| P33         | Fluticasone propionate-salmeterol; Salbutamol; Statin; Diuretic                                                                                             |
| P34         | Sitagliptin; Gliclazide; Ramipril; Atorvastatin; Symbicort                                                                                                  |
| P35         | Anti-hypertension; Symbicort                                                                                                                                |
| P36         | Furosemide; Ciclesonide; Lorazepam; Tamsulosin; Lamotrigine; Spiriva Respimat; Atorvastatin; Symbicort; Ferrous Gluconate; Apixaban; Flecainide; Salbutamol |
| P37         | Triptans                                                                                                                                                    |
| P38         | None                                                                                                                                                        |
| P39         | Symbicort                                                                                                                                                   |
| P40         | None                                                                                                                                                        |
| P41         | Symbicort; Ipratropium bromide; Beclomethasone Nasal Spray                                                                                                  |
| P42         | Symbicort; Perindopril; Amlodipine                                                                                                                          |

---

|     |                                                                                                                                                                           |
|-----|---------------------------------------------------------------------------------------------------------------------------------------------------------------------------|
| P43 | Symbicort                                                                                                                                                                 |
| P44 | Methylphenidate                                                                                                                                                           |
| P45 | Furosemide; Ferrous fumarate; Candesartan; Rivaroxaban; Levothyroxine                                                                                                     |
| P46 | Tansulosin; Bisoprolol; Ferrous fumarate; Apixaban; Rosuvastatin; Amlodipine; Finasteride; Fluticasone                                                                    |
| P47 | Bupropion                                                                                                                                                                 |
| P48 | None                                                                                                                                                                      |
| P49 | Amitriptyline                                                                                                                                                             |
| P50 | None                                                                                                                                                                      |
| P51 | Bupropion                                                                                                                                                                 |
| P52 | Formoterol-mometasone; Montelukast; Spiriva; Pantoprazole                                                                                                                 |
| P53 | Formoterol-mometasone; Salbutamol                                                                                                                                         |
| P54 | None                                                                                                                                                                      |
| P55 | Losartan, Clortalidone                                                                                                                                                    |
| P56 | Risedronic acid                                                                                                                                                           |
| P57 | Candesartan, Rosuvastatin, Metformin                                                                                                                                      |
| P58 | Gabapentin, Amitriptyline, Clonazepam, Progesterone, Estradiol                                                                                                            |
| P59 | Methylphenidate, Vortioxetine                                                                                                                                             |
| P60 | None                                                                                                                                                                      |
| P61 | Spiriva, Symbicort                                                                                                                                                        |
| P62 | None                                                                                                                                                                      |
| P63 | Gliclazide, Duloxetine, Advair, Semaglutide, Ipratropium bromide, Salbutamol, Pantoprazole, Ciclesonide, Spiriva, Atorvastatin, Metformin, Acetaminophen-codeine-caffeine |
| P64 | Conjugated estrogens, Oxybutynin, Pantoprazole, Vortioxetine                                                                                                              |
| P65 | Perindopril                                                                                                                                                               |
| P66 | Salbutamol                                                                                                                                                                |
| P67 | Bisoprolol, Bupropion, Metoclopramide                                                                                                                                     |
| P68 | Fluticasone furoate, Salbutamol, Carbamazepine                                                                                                                            |
| P69 | Formoterol-mometasone, Ferrous fumarate                                                                                                                                   |
| P70 | Rupatadine, Mometasone, Montelukast, Oral Contraceptive                                                                                                                   |
| P71 | Fluticasone propionate                                                                                                                                                    |
| P72 | Telmisartan, Bisoprolol, Thyroxine, Pantoprazole                                                                                                                          |
| P73 | Metoprolol, Ramipril, Amlodipine, Metformin, Sitagliptin, Gliclazide, Rosuvastatin                                                                                        |
| P74 | Levothyroxine, Rabepazole, Beclometasone, Tiotropium, Salbutamol                                                                                                          |
| P75 | Ramipril, Budesonide, Lansoprazole, Symbicort, Rosuvastatin, Bisoprolol, Spiriva                                                                                          |
| P76 | Fluticasone salmeterol, Spiriva, Fluticasone propionate, Benralizumab                                                                                                     |

---

**Table S3. Medications at Research Visit Summary**

| Parameter<br>n (%) | Ever-COVID<br>(n=76) | Ever-hospitalised<br>(n=23) | Never-hospitalised<br>(n=53) |
|--------------------|----------------------|-----------------------------|------------------------------|
| None               | 13 (17)              | 2 (9)                       | 11 (21)                      |
| SABA               | 10 (13)              | 4 (17)                      | 6 (11)                       |
| ICS                | 34 (45)              | 12 (52)                     | 22 (42)                      |
| LABA               | 30 (39)              | 10 (43)                     | 20 (38)                      |
| Anticoagulant      | 5 (7)                | 2 (9)                       | 3 (6)                        |
| Antibiotic         | 2 (3)                | 2 (9)                       | 0 (0)                        |
| Other              | 52 (68)              | 18 (78)                     | 34 (64)                      |

SABA=short-acting beta-agonist; ICS=inhaled corticosteroid; LABA=long-acting beta-agonist

**Table S4. CT Findings**

| Abnormality<br>n (%)      | Ever-<br>COVID<br>(n=50) | No Prior Lung<br>Diagnosis<br>COVID (n=34) | Asthma-<br>COVID<br>(n=13) | COPD-<br>COVID<br>(n=3) |
|---------------------------|--------------------------|--------------------------------------------|----------------------------|-------------------------|
| Ground-Glass Opacities    | 20 (40)                  | 14 (41)                                    | 5 (38)                     | 1 (33)                  |
| Consolidation             | 4 (8)                    | 2 (6)                                      | 1 (8)                      | 1 (33)                  |
| Reticulation              | 2 (4)                    | 2 (6)                                      | 0 (0)                      | 0 (0)                   |
| Atelectasis               | 14 (28)                  | 10 (29)                                    | 4 (31)                     | 0 (0)                   |
| Emphysema                 | 5 (10)                   | 1 (3)                                      | 2 (15)                     | 2 (67)                  |
| Honeycombing              | 1 (2)                    | 1 (3)                                      | 0 (0)                      | 0 (0)                   |
| Mosaic Attenuation        | 4 (8)                    | 3 (9)                                      | 1 (8)                      | 0 (0)                   |
| Bronchial Wall Thickening | 1 (2)                    | 1 (3)                                      | 0 (0)                      | 0 (0)                   |
| Nodules                   | 13 (26)                  | 8 (24)                                     | 5 (38)                     | 0 (0)                   |
| Bronchiectasis            | 11 (22)                  | 8 (24)                                     | 3 (23)                     | 0 (0)                   |
| Bronchiolectasia          | 1 (2)                    | 1 (3)                                      | 0 (0)                      | 0 (0)                   |

**Table S5. Pulmonary Function, Questionnaire and Imaging Measurements by Site**

| Parameter                            | Never-COVID (n=9) |                 |            | Ever-COVID (n=76) |                  |             |
|--------------------------------------|-------------------|-----------------|------------|-------------------|------------------|-------------|
|                                      | Site 1<br>(n=6)   | Site 2<br>(n=3) | Sig<br>. p | Site 1<br>(n=54)  | Site 2<br>(n=22) | Sig<br>p    |
| <i>Pulmonary function</i>            |                   |                 |            |                   |                  |             |
| FEV <sub>1</sub> * % <sub>pred</sub> | 100 (7)           | 103 (17)        | .7         | 86 (20)           | 81 (20)          | .4          |
| FVC* % <sub>pred</sub>               | 102 (7)           | 104 (16)        | .9         | 87 (18)           | 92 (24)          | .3          |
| FEV <sub>1</sub> /FVC*               | 0.80 (0.05)       | 0.84 (0.04)     | .3         | 0.77 (0.11)       | 0.74 (0.11)      | .2          |
| LCI* n breaths                       | 9.0 (1.4)         | ND              | -          | 10.7 (3.9)        | ND               | -           |
| LCI <sub>ao</sub> * n breaths        | 8.0 (1.3)         | ND              | -          | 9.5 (3.3)         | ND               | -           |
| DL <sub>CO</sub> * % <sub>pred</sub> | -                 | -               | -          | 81 (21)           | 105 (35)         | <b>.007</b> |
| <i>Exercise capacity and QoL</i>     |                   |                 |            |                   |                  |             |
| 6MWD* m                              | -                 | -               | -          | 435 (79)          | 491 (80)         | <b>.008</b> |
| SpO <sub>2</sub> post-exertion* %    | -                 | -               | -          | 97 (3)            | 99 (2)           | <b>.01</b>  |
| SGRQ*                                | -                 | -               | -          | 34 (17)           | 38 (19)          | .4          |
| mMRC*                                | -                 | -               | -          | 1 (1)             | 1 (1)            | .3          |
| IPAQ* MET-minutes                    | -                 | -               | -          | 4276 (4651)       | 5778 (5451)      | .3          |
| <i>MRI</i>                           |                   |                 |            |                   |                  |             |
| VDP %                                | 1.4 (1.0)         | 0.5 (0.3)       | .2         | 6.2 (7.9)         | 3.6 (4.3)        | .2          |
| <i>CT*</i>                           |                   |                 |            |                   |                  |             |
| TAC                                  | -                 | -               | -          | 270 (104)         | 267 (139)        | .9          |
| WA mm <sup>2</sup>                   | -                 | -               | -          | 66 (2)            | 67 (3)           | .4          |
| LA mm <sup>2</sup>                   | -                 | -               | -          | 14 (3)            | 12 (3)           | .2          |
| WT mm                                | -                 | -               | -          | 1.4 (0.1)         | 1.3 (0.1)        | .2          |

FEV<sub>1</sub>=forced expiratory volume in 1 second; %<sub>pred</sub>=percent of predicted value; FVC=forced vital capacity; LCI=lung clearance index; ND=not done; ao=airway opening; DL<sub>CO</sub>=diffusing capacity of the lungs for carbon monoxide; QoL=quality-of-life; 6MWD=six-minute walk distance; SGRQ=St. George's Respiratory Questionnaire; mMRC=modified Medical Research Council dyspnea score; IPAQ=International Physical Activity Questionnaire; MRI=magnetic resonance imaging; VDP=ventilation defect percent; CT=computed tomography; TAC=total airway count; WA=wall area; LA=lumen area; WT=wall thickness.  
p=significance value between Site 1 and Site 2.

FEV<sub>1</sub>\*, FVC\* and FEV<sub>1</sub>/FVC\*: Ever-COVID Site 1 n=53

LCI\*: Never-COVID n=5, Ever-COVID Site 1 n=44

LCI<sub>ao</sub>\*: Never-COVID n=5, Ever-COVID Site 1 n=32

DL<sub>CO</sub>\*: Ever-COVID Site 1 n=43, Ever-COVID Site 2 n=21

6MWD\* and mMRC\*: Ever-COVID Site 1 n=43

SpO<sub>2</sub> post-exertion\*: Ever-COVID Site 1 n=43

SGRQ\*: Ever-COVID Site 1 n=44, Ever-COVID Site 2 n=20

IPAQ\*: Ever-COVID Site 1 n=42, Ever-COVID Site 2 n=17

CT\*: Ever-COVID Site 1 n=36, Ever-COVID Site 2 n=8

**Table S6. Characteristics by Previous Lung disease**

| Parameter mean (SD)<br>[mean/MEDIAN: min-max] | No Prior Lung<br>Diagnosis<br>COVID<br>(n=49) | Asthma-COVID<br>(n=21) | COPD-COVID<br>(n=6) | Sig.<br>p       |
|-----------------------------------------------|-----------------------------------------------|------------------------|---------------------|-----------------|
| Age years                                     | 52 (12)                                       | 55 (13)                | 59 (11)             | .3              |
| Female n (%)                                  | 23 (47)                                       | 14 (67)                | 1 (17)              | -               |
| BMI kg/m <sup>2</sup>                         | 30 (5)                                        | 28 (6)                 | 30 (4)              | .4              |
| SpO <sub>2</sub> %                            | 97 (1)                                        | 97 (2)                 | 96 (2)              | .1              |
| Heart rate beats/min                          | 78 (13)                                       | 75 (14)                | 79 (8)              | .6              |
| Blood pressure mmHg                           | 126/82 (15/10)                                | 124/81 (13/9)          | 120/78 (13/13)      | -               |
| Weeks Since + COVID Test                      | [14/12: 5-53]                                 | [13/12: 6-29]          | [13/13: 6-20]       | .8              |
| Smoking history pack-years                    | 4 (11)                                        | 5 (10)                 | 50 (27)             | <b>&lt;.001</b> |
| Ever-hospitalised n (%)                       | 18 (37)                                       | 5 (24)                 | 2 (33)              | -               |
| Hospital Admission days                       | 14 (18)                                       | 8 (6)                  | 7 (1)               | -               |
| <i>Pulmonary function</i>                     |                                               |                        |                     |                 |
| FEV <sub>1</sub> * % <sub>pred</sub>          | 87 (18)                                       | 82 (24)                | 74 (24)             | .3              |
| FVC* % <sub>pred</sub>                        | 88 (19)                                       | 85 (21)                | 96 (19)             | .1              |
| FEV <sub>1</sub> /FVC*                        | 0.79 (0.08)                                   | 0.75 (0.12)            | 0.60 (0.16)         | <b>&lt;.001</b> |
| LCI* n breaths                                | 11.1 (3.9)                                    | 9.9 (4.1)              | 10.4 (2.5)          | .7              |
| LCI <sub>ao</sub> * n breaths                 | 9.3 (3.3)                                     | 10.0 (3.6)             | 8.4                 | .8              |
| DLCO* % <sub>pred</sub>                       | 90 (33)                                       | 88 (19)                | 77 (16)             | .6              |
| <i>Exercise capacity and QoL</i>              |                                               |                        |                     |                 |
| 6MWD* m                                       | 468 (74)                                      | 445 (81)               | 382 (127)           | .05             |
| SpO <sub>2</sub> post-exertion* %             | 97 (3)                                        | 98 (2)                 | 96 (4)              | .6              |
| SGRQ*                                         | 34 (16)                                       | 38 (21)                | 25 (21)             | .7              |
| mMRC*                                         | 1 (1)                                         | 1 (1)                  | 1 (1)               | .7              |
| IPAQ* MET-minutes                             | 5286 (5448)                                   | 3577 (3727)            | 3060 (1767)         | .5              |
| <i>MRI</i>                                    |                                               |                        |                     |                 |
| VDP %                                         | 3.6 (4.2)                                     | 6.7 (7.6)              | 15.8 (14.1)         | <b>&lt;.001</b> |
| <i>CT*</i>                                    |                                               |                        |                     |                 |
| TAC                                           | 294 (117)                                     | 241 (76)               | 126 (61)            | .06             |
| WA mm <sup>2</sup>                            | 66 (2)                                        | 67 (2)                 | 68 (2)              | .08             |
| LA mm <sup>2</sup>                            | 15 (3)                                        | 12 (3)                 | 11 (1)              | .09             |
| WT mm                                         | 1.4 (0.1)                                     | 1.3 (0.1)              | 1.3 (0.02)          | <b>.04</b>      |

COPD=chronic obstructive pulmonary disease; BMI=body mass index; FEV<sub>1</sub>=forced expiratory volume in 1 second; %<sub>pred</sub>=percent of predicted value; FVC=forced vital capacity; LCI=lung clearance index; ao=airway opening; DLCO=diffusing capacity of the lungs for carbon monoxide; QoL=quality-of-life; 6MWD=six-minute walk distance; SGRQ=St. George's Respiratory Questionnaire; mMRC=modified Medical Research Council dyspnea score; IPAQ=International Physical Activity Questionnaire; MRI=magnetic resonance imaging; VDP=ventilation defect percent; CT=computed tomography; TAC=total airway count; WA=wall area; LA=lumen area; WT=wall thickness.

p=significance value for ANOVA.

FEV<sub>1</sub>\*, FVC\* and FEV<sub>1</sub>/FVC\*: Asthma-COVID n=20

LCI\*: No Prior Lung Diagnosis COVID n=29, Asthma-COVID n=12, COPD-COVID n=3

LCI<sub>ao</sub>\*: No Prior Lung Diagnosis COVID n=22, Asthma-COVID n=4, COPD-COVID n=1

DLCO\*: No Prior Lung Diagnosis COVID n=43, Asthma-COVID n=16, COPD-COVID n=5

6MWD\* and mMRC\*: No Prior Lung Diagnosis COVID n=42, Asthma-COVID n=18

SpO<sub>2</sub> post-exertion\*: No Prior Lung Diagnosis COVID n=42, Asthma-COVID n=17

SGRQ\*: No Prior Lung Diagnosis COVID n=42, Asthma-COVID n=17

IPAQ\*: No Prior Lung Diagnosis COVID n=38, Asthma-COVID n=18, COPD-COVID n=3



CT\*: No Prior Lung Diagnosis COVID n=28, Asthma-COVID n=14, COPD-COVID n=2

**Table S7. Relationships between pulmonary function tests, imaging and quality-of-life measurements**

|                                    | Days Since +COVID |            | Hospital Admission Days |             | BMI  |                 | Baseline SpO <sub>2</sub> |                 | FEV <sub>1</sub> |                 | FEV <sub>1</sub> % <sub>pred</sub> |                 | FVC  |                 | FVC % <sub>pred</sub> |                 | FEV <sub>1</sub> /FVC |                 | LCI  |                 | LCI <sub>ao</sub> |                 | DL <sub>CO</sub> % <sub>pred</sub> |                 | 6MWD |                 | Post SpO <sub>2</sub> |                 | Post Borg |                 | Post RPE |                 | SGRQ       |                 | IPAQ |     | mMRC       |                 | VDP        |                 | TAC         |                 | WA          |                 | LA   |                 | WT   |                 |     |     |
|------------------------------------|-------------------|------------|-------------------------|-------------|------|-----------------|---------------------------|-----------------|------------------|-----------------|------------------------------------|-----------------|------|-----------------|-----------------------|-----------------|-----------------------|-----------------|------|-----------------|-------------------|-----------------|------------------------------------|-----------------|------|-----------------|-----------------------|-----------------|-----------|-----------------|----------|-----------------|------------|-----------------|------|-----|------------|-----------------|------------|-----------------|-------------|-----------------|-------------|-----------------|------|-----------------|------|-----------------|-----|-----|
|                                    | r/ρ               | p          | r/ρ                     | p           | r/ρ  | p               | r/ρ                       | p               | r/ρ              | p               | r/ρ                                | p               | r/ρ  | p               | r/ρ                   | p               | r/ρ                   | p               | r/ρ  | p               | r/ρ               | p               | r/ρ                                | p               | r/ρ  | p               | r/ρ                   | p               | r/ρ       | p               | r/ρ      | p               | r/ρ        | p               | r/ρ  | p   | r/ρ        | p               | r/ρ        | p               | r/ρ         | p               | r/ρ         | p               | r/ρ  | p               |      |                 |     |     |
| Days Since +COVID                  | 1.0               |            | .3                      | .2          | .1   | .3              | -.02                      | .8              | .03              | .8              | .1                                 | .4              | .02  | .9              | -.5                   | <b>.02</b>      | .1                    | .2              | -.05 | .8              | -.06              | .8              | -.3                                | <b>.01</b>      | -.2  | .2              | -.06                  | .5              | .06       | .6              | .1       | .4              | .1         | .3              | .05  | .7  | .2         | .2              | .02        | .9              | .1          | .5              | .003        | 1.0             | .2   | .3              | .3   | .07             |     |     |
| Hospital Admission Days            | .3                | .2         | 1.0                     |             | -.3  | .2              | -.02                      | .9              | -.2              | .4              | -.2                                | .3              | -.3  | .2              | -.09                  | .5              | .5                    | <b>.02</b>      | .5   | .06             | .7                | <b>.04</b>      | -.6                                | <b>.005</b>     | .2   | .4              | -.5                   | .06             | .01       | 1.0             | .1       | .7              | -.2        | .5              | .2   | .5  | .1         | .6              | .2         | .4              | .7          | <b>.045</b>     | -.4         | .3              | .6   | .08             | .7   | <b>.02</b>      |     |     |
| BMI                                | .1                | .3         | -.3                     | .2          | 1.0  |                 | -.4                       | <b>.002</b>     | -.04             | .7              | .1                                 | .4              | -.05 | .7              | .06                   | .6              | -.08                  | .5              | .005 | 1.0             | -.08              | .7              | .2                                 | .1              | -.4  | <b>&lt;.001</b> | -.1                   | .3              | .06       | .6              | .3       | <b>.04</b>      | .2         | .06             | -.1  | .4  | .05        | .7              | .2         | .2              | -.2         | .2              | .3          | -.1             | .4   | .02             | .9   |                 |     |     |
| Baseline SpO <sub>2</sub>          | -.02              | .8         | -.02                    | .9          | -.4  | <b>.002</b>     | 1.0                       |                 | .1               | .3              | .04                                | .7              | .05  | .7              | .04                   | .7              | .2                    | .1              | -.3  | .07             | -.4               | <b>.02</b>      | .3                                 | <b>.02</b>      | .4   | <b>.001</b>     | .7                    | <b>&lt;.001</b> | .1        | .6              | -.08     | .6              | -.1        | .3              | .2   | .06 | -.08       | .5              | -.4        | <b>&lt;.001</b> | .2          | .2              | -.2         | .1              | .2   | .3              | .02  | .9              |     |     |
| FEV <sub>1</sub>                   | .03               | .8         | -.2                     | .4          | -.04 | .7              | .1                        | .3              | 1.0              |                 | .7                                 | <b>&lt;.001</b> | .9   | <b>&lt;.001</b> | .5                    | <b>&lt;.001</b> | .4                    | <b>.003</b>     | -.4  | <b>.01</b>      | -.3               | <b>.01</b>      | .4                                 | <b>.002</b>     | .3   | <b>.03</b>      | .1                    | .3              | -.2       | .2              | .07      | .7              | -.2        | .1              | .08  | .5  | -.3        | <b>.01</b>      | -.1        | .2              | .2          | .3              | -.03        | .7              | .3   | .07             | .3   | <b>.046</b>     |     |     |
| FEV <sub>1</sub> % <sub>pred</sub> | .1                | .4         | -.2                     | .3          | .1   | .4              | .04                       | .7              | .7               | <b>&lt;.001</b> | 1.0                                |                 | .5   | <b>&lt;.001</b> | .8                    | <b>&lt;.001</b> | .4                    | <b>&lt;.001</b> | -.3  | <b>.048</b>     | -.3               | .07             | .4                                 | <b>.001</b>     | .2   | .1              | .3                    | <b>.049</b>     | -.2       | .2              | .2       | .2              | .2         | -.1             | .3   | .01 | .9         | -.1             | .3         | -.3             | <b>.006</b> | .3              | <b>.045</b> | -.3             | .07  | .2              | .1   | .2              | .3  |     |
| FVC                                | .02               | .9         | -.3                     | .2          | -.05 | .7              | .05                       | .7              | .9               | <b>&lt;.001</b> | .5                                 | <b>&lt;.001</b> | 1.0  |                 | .6                    | <b>&lt;.001</b> | -.05                  | .7              | -.3  | .06             | -.2               | .3              | .3                                 | <b>.03</b>      | .2   | .08             | .07                   | .6              | -.1       | .3              | .02      | .9              | -.2        | .08             | .1   | .4  | -.3        | <b>.02</b>      | .02        | .9              | .01         | .9              | .07         | .6              | .02  | .3              | .3   | .09             |     |     |
| FVC % <sub>pred</sub>              | -.5               | <b>.02</b> | -.09                    | .5          | .06  | .6              | .04                       | .7              | .5               | <b>&lt;.001</b> | .8                                 | <b>&lt;.001</b> | .6   | <b>&lt;.001</b> | 1.0                   |                 | -.2                   | .2              | -.3  | .08             | -.3               | .1              | .4                                 | <b>&lt;.001</b> | .2   | .2              | .3                    | <b>.03</b>      | -.1       | .6              | .3       | <b>.02</b>      | -.1        | .4              | .08  | .6  | -.1        | .3              | -.07       | .5              | .1          | .4              | -.02        | .9              | -.03 | .8              | -.05 | .8              |     |     |
| FEV <sub>1</sub> /FVC              | .1                | .2         | .5                      | <b>.02</b>  | -.08 | .5              | .2                        | .1              | .4               | <b>.003</b>     | .4                                 | <b>&lt;.001</b> | -.05 | .7              | -.2                   | .2              | 1.0                   |                 | -.1  | .4              | -.2               | .4              | .05                                | .7              | .1   | .4              | .002                  | 1.0             | -.1       | .4              | .1       | .5              | -.1        | .4              | -.05 | .7  | -.08       | .5              | -.2        | <b>.04</b>      | .3          | <b>.03</b>      | -.4         | <b>.02</b>      | .3   | <b>.03</b>      | .2   | .3              |     |     |
| LCI                                | -.05              | .8         | .5                      | .06         | .005 | 1.0             | -.3                       | .07             | -.4              | <b>.01</b>      | -.3                                | <b>.048</b>     | -.3  | .06             | -.3                   | .08             | -.1                   | .4              | 1.0  |                 | .9                | <b>&lt;.001</b> | -.6                                | <b>&lt;.001</b> | -.3  | .08             | .5                    | <b>.006</b>     | -.1       | .6              | -.1      | .5              | .02        | .9              | .1   | .6  | .2         | .3              | .2         | .1              | .2          | .5              | -.3         | .1              | -.05 | .8              | -.1  | .5              |     |     |
| LCI <sub>ao</sub>                  | -.06              | .8         | .7                      | <b>.04</b>  | -.08 | .7              | -.4                       | <b>.02</b>      | -.3              | <b>.01</b>      | -.3                                | .07             | -.2  | .3              | -.3                   | .1              | -.2                   | .4              | .9   | <b>&lt;.001</b> | 1.0               |                 | -.4                                | <b>.02</b>      | -.2  | .2              | -.5                   | <b>.007</b>     | -.09      | .6              | -.2      | .2              | -.2        | .2              | -.2  | .2  | -.06       | .8              | -.08       | .7              | .3          | .1              | .05         | .8              | -.4  | .06             | .03  | .9              | .01 | 1.0 |
| DL <sub>CO</sub> % <sub>pred</sub> | -.4               | <b>.01</b> | -.6                     | <b>.005</b> | .2   | .1              | .3                        | <b>.02</b>      | .4               | <b>.002</b>     | .4                                 | <b>.001</b>     | .3   | <b>.03</b>      | .4                    | <b>&lt;.001</b> | .05                   | .7              | -.6  | <b>&lt;.001</b> | -.4               | <b>.02</b>      | 1.0                                |                 | .4   | <b>.006</b>     | .3                    | <b>.03</b>      | .1        | .5              | .2       | .3              | -.02       | .9              | .02  | .9  | -.3        | <b>.02</b>      | -.2        | .09             | .09         | .6              | -.04        | .8              | -.02 | .9              | -.05 | .8              |     |     |
| 6MWD                               | -.2               | .2         | .2                      | .4          | -.4  | <b>&lt;.001</b> | .4                        | <b>.001</b>     | .3               | <b>.03</b>      | .2                                 | .1              | .2   | .08             | .2                    | .1              | .4                    | -.3             | .08  | -.2             | .2                | .4              | <b>.006</b>                        | 1.0             |      | .4              | <b>&lt;.001</b>       | .008            | 1.0       | -.2             | .3       | -.3             | <b>.02</b> | .1              | .3   | -.3 | <b>.02</b> | -.3             | <b>.01</b> | .06             | .7          | .02             | .9          | -.1             | .4   | -.08            | .6   |                 |     |     |
| Post SpO <sub>2</sub>              | -.07              | .6         | -.5                     | .06         | -.1  | .3              | .7                        | <b>&lt;.001</b> | .1               | .4              | .3                                 | <b>.049</b>     | .07  | .6              | .3                    | <b>.03</b>      | .002                  | 1.0             | -.5  | <b>.006</b>     | -.5               | <b>.007</b>     | .3                                 | <b>.03</b>      | .4   | <b>&lt;.001</b> | 1.0                   |                 | .2        | <b>.046</b>     | .09      | .6              | .07        | .6              | .06  | .7  | .1         | .4              | -.4        | <b>&lt;.001</b> | -.09        | .6              | .04         | .8              | -.2  | .1              | -.2  | .1              |     |     |
| Post Borg                          | .06               | .6         | .01                     | 1.0         | .06  | .6              | .1                        | .6              | -.2              | .2              | -.2                                | .2              | -.1  | .3              | -.1                   | .6              | -.1                   | .4              | -.1  | .6              | -.09              | .6              | .1                                 | .5              | .008 | 1.0             | .2                    | <b>.046</b>     | 1.0       |                 | .6       | <b>&lt;.001</b> | .6         | <b>&lt;.001</b> | -.2  | .2  | .4         | <b>&lt;.001</b> | -.02       | .8              | .003        | 1.0             | .01         | .5              | -.2  | .3              | -.2  | .1              |     |     |
| Post RPE                           | .1                | .4         | .1                      | .7          | .3   | <b>.04</b>      | -.08                      | .6              | .07              | .7              | .2                                 | .2              | .02  | .9              | .3                    | <b>.02</b>      | .1                    | .5              | -.1  | .5              | -.2               | .2              | -.2                                | .3              | -.2  | .3              | -.09                  | .6              | .6        | <b>&lt;.001</b> | 1.0      |                 | .7         | <b>&lt;.001</b> | -.2  | .2  | .3         | <b>.02</b>      | .1         | .5              | .1          | .5              | .04         | .8              | -.07 | .7              | -.05 | .8              |     |     |
| SGRQ                               | .1                | .3         | -.2                     | .5          | .2   | .06             | -.1                       | .3              | -.2              | .1              | -.1                                | .3              | -.2  | .08             | -.1                   | .4              | -.1                   | .4              | .02  | .9              | -.2               | .2              | -.02                               | .9              | -.3  | <b>.02</b>      | .07                   | .6              | .6        | <b>&lt;.001</b> | .7       | <b>&lt;.001</b> | 1.0        |                 | -.2  | .09 | .7         | <b>&lt;.001</b> | .09        | .5              | -.07        | .6              | .1          | .5              | -.3  | .1              | -.2  | .2              |     |     |
| IPAQ                               | .05               | .7         | .2                      | .5          | -.1  | .4              | .2                        | .06             | .08              | .5              | .01                                | .9              | .1   | .4              | .08                   | .6              | -.05                  | .7              | .1   | .6              | -.06              | .8              | .02                                | .9              | .1   | .3              | .06                   | .7              | -.2       | .2              | -.2      | .2              | -.2        | .2              | -.1  | .4  | -.01       | .5              | .1         | .5              | .08         | .6              | -.2         | .2              | -.2  | .2              |      |                 |     |     |
| mMRC                               | .2                | .2         | .1                      | .6          | .05  | .7              | -.08                      | .5              | -.3              | <b>.01</b>      | -.1                                | .3              | -.3  | <b>.02</b>      | -.1                   | .3              | -.08                  | .5              | .2   | .3              | -.08              | .7              | -.3                                | <b>.02</b>      | -.3  | <b>.02</b>      | .1                    | .4              | .4        | <b>&lt;.001</b> | .3       | <b>.02</b>      | .7         | <b>&lt;.001</b> | -.1  | .4  | 1.0        |                 | .1         | .3              | -.06        | .7              | -.04        | .8              | -.07 | .7              | -.1  | .5              |     |     |
| VDP                                | .02               | .9         | .2                      | .4          | .2   | .2              | -.4                       | <b>&lt;.001</b> | -.1              | .2              | -.3                                | <b>.006</b>     | 0.2  | .9              | -.07                  | .5              | -.2                   | <b>.04</b>      | .2   | .1              | .3                | .1              | -.2                                | .09             | -.3  | <b>.01</b>      | -.4                   | <b>&lt;.001</b> | -.02      | .8              | .1       | .5              | .08        | .5              | -.01 | .5  | .1         | .3              | 1.0        |                 | -.1         | .4              | .3          | .07             | -.1  | .4              | -.2  | .3              |     |     |
| TAC                                | .1                | .5         | .7                      | <b>.045</b> | -.2  | .2              | .2                        | .2              | .2               | .3              | .3                                 | <b>.045</b>     | .01  | .9              | .1                    | .4              | .3                    | <b>.03</b>      | .2   | .5              | .06               | .8              | .09                                | .6              | .06  | .7              | -.09                  | .6              | .003      | 1.0             | .1       | .5              | -.07       | .6              | .1   | .5  | -.06       | .7              | -.1        | .4              | 1.0         |                 | -.8         | <b>&lt;.001</b> | .7   | <b>&lt;.001</b> | .5   | <b>&lt;.001</b> |     |     |
| WA                                 | .003              | 1.0        | -.4                     | .3          | .2   | .3              | -.2                       | .1              | -.06             | .7              | -.3                                | .07             | .07  | .6              | -.02                  | .9              | -.4                   | <b>.02</b>      | -.3  | .1              | -.4               | .06             | -.04                               | .8              | .02  | .09             | .04                   | .8              | .01       | .5              | .04      | .8              | .1         | .5              | .08  | .6  | -.04       | .8              | .3         | .07             | -.8         | <b>&lt;.001</b> | 1.0         |                 | -.7  | <b>&lt;.001</b> | -.4  | <b>.009</b>     |     |     |
| LA                                 | .2                | .3         | .6                      | .08         | -.1  | .4              | .2                        | .3              | .3               | .07             | .2                                 | .1              | .2   | .3              | -.03                  | .8              | .3                    | <b>.03</b>      | -.05 | .8              | .3                | .9              | -.02                               | .9              | -.1  | .4              | -.2                   | .1              | -.2       | .3              | -.07     | .7              | -.3        | .1              | -.2  | .2  | -.07       | .7              | -.1        | .2              | .7          | <b>&lt;.001</b> | -.7         | <b>&lt;.001</b> | 1.0  |                 | .8   | <b>&lt;.001</b> |     |     |
| WT                                 | .3                | .07        | .7                      | <b>.02</b>  | .02  | .9              | .02                       | .9              | .3               | <b>.046</b>     | .2                                 | .3              | .3   | .09             | -.05                  | .8              | .2                    | .3              | -.1  | .5              | .01               | 1.0             | -.05                               | .8              | -.08 | .6              | -.2                   | .1              | -.2       | .1              | -.05     | .8              | -.2        | .2              | -.2  | .2  | -.1        | .5              | -.2        | .3              | .5          | <b>.001</b>     | -.4         | <b>.009</b>     | .8   | <b>&lt;.001</b> | 1.0  |                 |     |     |

BMI=body mass index; FEV<sub>1</sub>=forced expiratory volume in 1 second; %<sub>pred</sub>=percent of predicted value; FVC=forced vital capacity; LCI=lung clearance index; ao=airway opening; DL<sub>CO</sub>=diffusing capacity of the lungs for carbon monoxide; 6MWD=six-minute walk distance; post=post-exertion (post-six minute walk test); Borg=Borg rating of perceived exertion; RPE=rated perceived exertion scale; SGRQ=St. George's respiratory capacity; IPAQ=international physical activity questionnaire; mMRC=modified medical research council dyspnea scale; VDP=ventilation defect percent; TAC=total airway count; WA=wall area; LA=lumen area; WT=wall thickness; r=Pearson correlation coefficient; ρ=Spearman correlation coefficient; p=uncorrected p value

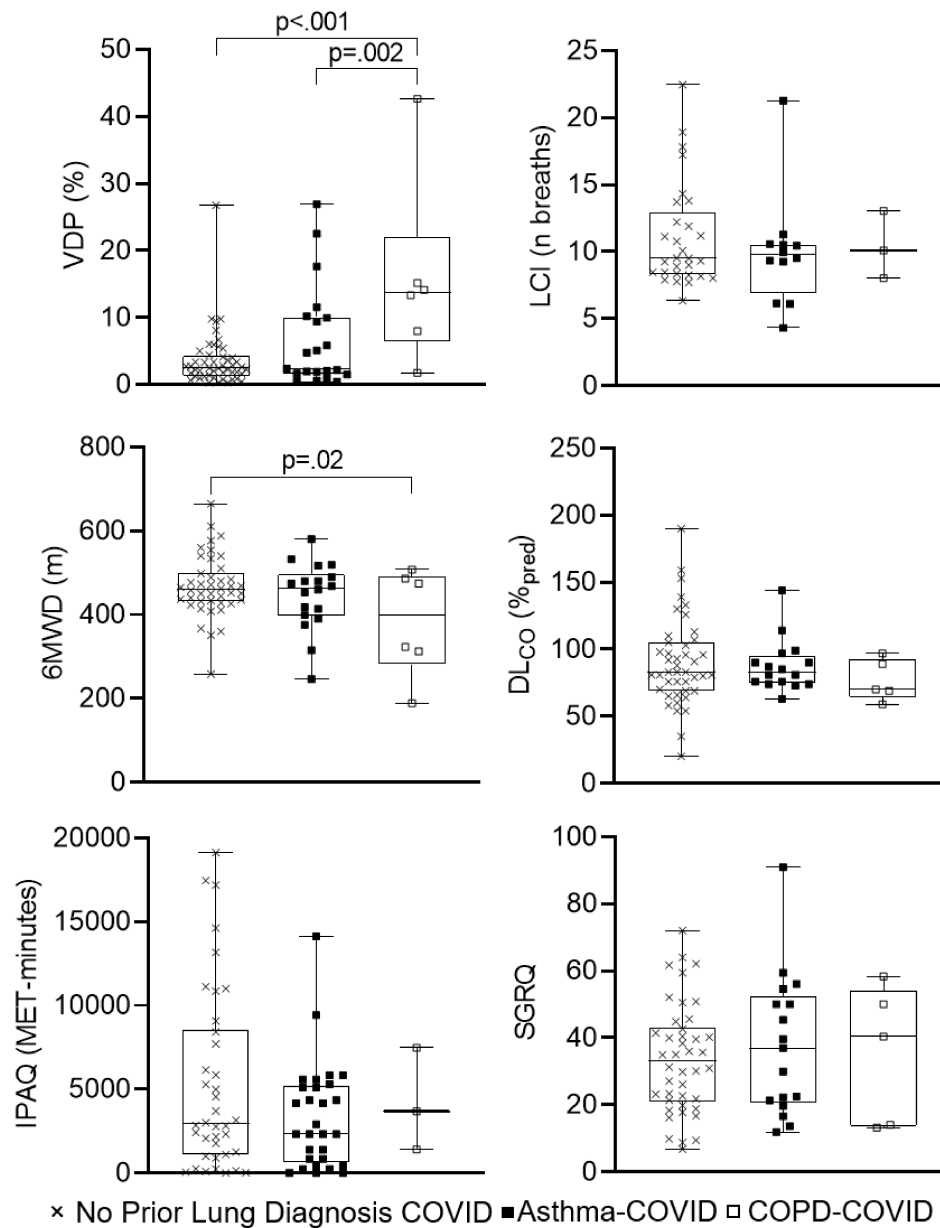

**Figure S1.  $^{129}\text{Xe}$  MRI VDP, pulmonary function, exercise capacity and quality-of-life by prior respiratory illness**

VDP significantly different for COPD-COVID vs. no prior lung diagnosis COVID ( $p < .001$ ) and asthma-COVID ( $p = .002$ ). 6MWD significantly different for no prior lung diagnosis COVID vs. COPD-COVID ( $p = .02$ ). LCI, DLco, IPAQ and SGRQ not significantly different between groups.

VDP=ventilation defect percent; LCI=lung clearance index; 6MWD=six-minute walk distance; DLco=diffusing capacity of the lungs; %pred=percent of predicted value; IPAQ=International Physical Activity Questionnaire; SGRQ=St. George's Respiratory Questionnaire.

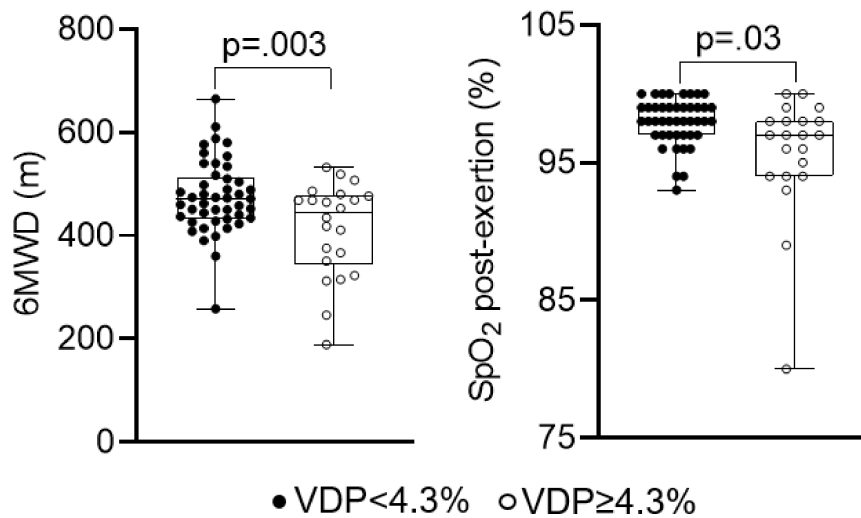**Figure S2. Abnormal VDP Subgroups**

6MWD significantly worse in VDP $\geq$ 4.3% than VDP<4.3% (p=.003)

SpO<sub>2</sub> post-exertion significantly worse in VDP $\geq$ 4.3% than VDP<4.3% (p=.03)

6MWD=six-minute walk distance; VDP=ventilation defect percent
